1 Genetic diversity and evolution of Hantaan virus in China and its neighbors

2

3 Genetic diversity and evolution of Hantaan virus

4

5 *Naizhe Li<sup>a</sup>, Aqian Li<sup>a</sup>, Yang Liu<sup>a</sup>, Wei Wu<sup>a</sup>, Chuan Li<sup>a</sup>, Dongyang Yu<sup>b</sup>, Yu Zhu<sup>b</sup>,*

6 *Jiandong Li<sup>a</sup>, Dexin Li<sup>a</sup>, Shiwen Wang<sup>a,c,\*</sup>, Mifang Liang<sup>a,c,\*</sup>*

7

8 <sup>a</sup> Key Laboratory of Medical Virology and Viral Diseases, Ministry of Health

9 of People's Republic of China, National Institute for Viral Disease Control

10 and Prevention, Chinese Center for Disease Control and Prevention, Beijing,

11 102206, China.

12 <sup>b</sup> Department of Microbiology, Anhui Medical University, Hefei, 230032,

13 China.

14 <sup>c</sup> Center for Biosafety Mega-Science, Chinese Academy of Sciences, Beijing

15 100049, P. R. China

16

17 \*Address correspondence to Shiwen Wang, [wangsw@ivdc.chinacdc.cn](mailto:wangsw@ivdc.chinacdc.cn).

18 \*Address correspondence to Mifang Liang, [liangmf@ivdc.chinacdc.cn](mailto:liangmf@ivdc.chinacdc.cn).

19

## 20 **Abstract**

## 21 **Background**

22 Hantaan virus (*HTNV*), as one of the pathogenic hantaviruses of HFRS, has  
 23 raised serious concerns in Eurasia. China and its neighbors, especially  
 24 Russia and South Korea, are seriously suffered HTNV infections. Recent  
 25 studies reported genetic diversity and phylogenetic features of HTNV in  
 26 different parts of China, but the analyses from the holistic perspective are  
 27 rare.

## 28 **Methodology and Principal Findings**

29 To better understand HTNV genetic diversity and dynamics, we analyzed all  
 30 available complete sequences derived from the S and M segments with bio-  
 31 informatic tools. Our study revealed 11 phylogroups and sequences showed  
 32 obvious geographic clustering. We found 42 significant amino acid variants  
 33 sites and 18 of them located in immune epitopes. Nine recombination events  
 34 and seven reassortment isolates were detected in our study. Sequences from  
 35 Guizhou were highly genetic divergent, characterized by the emergence of  
 36 multiple lineages, recombination and reassortment events. We found that  
 37 HTNV probably emerged in Zhejiang about 1,000 years ago and the  
 38 population size expanded from 1980s to 1990s. Bayesian stochastic search  
 39 variable selection analysis revealed that Heilongjiang, Shaanxi and Guizhou  
 40 played important roles in HTNV evolution and migration.

## Conclusions/Significance

These findings reveal the original and evolution features of HTNV which might assist in understanding Hantavirus epidemics and would be useful for disease prevention and control.

## Author summary

Hemorrhagic Fever with Renal Syndrome (HFRS) and Hantavirus Pulmonary Syndrome (HPS) are endemic zoonotic infectious diseases caused by hantaviruses that belong to the Family Bunyaviridae. Hantaviruses have gained worldwide attention as etiological agents of emerging zoonotic diseases, with fatality rates ranging from <10% up to 60%. However, our knowledge about the emergence and evolution of HTNV is limited. To get more information about HTNV genetic diversity and phylogenetic features in holistic perspective, we investigated the genetic diversity and spatial distribution of HTNV using all available whole genomic sequences of S and M segments. We also gain insights into the genetic diversity and spatial-temporal dynamics of HTNV. These data can augment traditional approach to infectious disease surveillance and control.

**Keywords** Hantaan virus; recombination; Bayesian phylogenetics; Viral phylodynamic; Spatial transmission

## Introduction

Hantaviruses have gained worldwide attention as etiological agents of emerging zoonotic diseases, namely hemorrhagic fever with renal syndrome (HFRS) in Eurasia and hantavirus cardiopulmonary syndrome (HCPS) in Americas, with fatality rates ranging from <10% up to 60%[1]. Among all the countries, China is the most seriously affected one which account for over 90% of the total HFRS cases around the world[2, 3]. It has been reported that the HFRS death rate in China was 2.89% during the years 1950– 2014[4]. Although a declining HFRS trend has been observed at a global scale in China, there still exist certain local regions that continue to display increasing HFRS trends [5]. However, the causative agent of the disease remained unknown until the early 1970s, when Lee et al. reported on Hantaan virus (HTNV), present in the lungs of its natural reservoir, the striped field mouse (*Apodemus agrarius*)[6].

Hantaan virus, as one of the pathogenic hantaviruses of HFRS, is a member of genus *Orthohantavirus*, family *Hantaviridae* in the order *Bunyavirales*. The virus genome consists of three separate segments of negative-stranded RNA referred to as small (S), medium (M), and large (L) segments, which encode nucleocapsid protein (NP), two envelope glycoproteins (Gn and Gc) and viral RNA-dependent RNA polymerase (RdRP), respectively[7]. Recent studies[8-10] reported genetic diversity and phylogenetic features of HTNV in different

parts of China, but the analyses from the holistic perspective are rare. Also, the mechanisms underlying the emergence and evolution of HTNV are poorly understood. Understanding the phylogenetic factors contributing to HTNV transmission has important implications for our understanding of its epidemiology and providing insights about the surveillance and outbreak predictions or preparation.

In this study, we focused on the genetic diversity and evolution history of Hantaan virus. Whole-genome sequences were analyzed with bio-information tools. The results revealed the phylogenetic relationships among HTNV strains with both Bayesian and Maximum Likelihood methods. To deduce geographic origins and migration patterns of HTNV epidemics, BEAST software was used in this study. Furthermore, the recombination and reassortment events were also detected.

## **Materials and methods.**

### **1. Sequence dataset**

All the complete S gene and M gene sequences of Hantaan orthohantavirus deposited until June 2019 were collected from Virus Pathogen Database and Analysis Resource (ViPR, [www.viprbrc.org](http://www.viprbrc.org)). Only one sequence was retained for the identity sequences with the same strain names. It should be mentioned that sequences from Shandong

province (accession no. KY639536-KY639711) were not defined as HTNV by ViPR and Genbank but can be organized in Hantaan orthohantavirus (see below). These sequences were still analyzed in this study. All the sequences were aligned using MAFFT version7[11] with default settings followed by manual refinement. The coding sequences were retained and used for the following analyses[12].

## 2. Recombination detection

As recombination seriously affects phylogenetic inference, the whole dataset was tested for the presence of recombination signals using RDP4[13]. RDP, GENECONV, Maximum Chi-squared, Chimaera, Bootscan, Sister Scanning and 3Seq were used. Only events with P values  $\leq 0.01$  that were confirmed by four or more methods were considered as recombination.

## 3. Phylogenetic analyses and amino acid substitution analyses

To reduce the potential bias, the recombination segments were removed from the datasets firstly. The phylogenetic relationships of the complete S and M gene sequences were estimated using a Bayesian Markov Chain Monte Carlo (MCMC) method as implemented in MrBayes v3.2.2[14] and a maximum-likelihood (ML) phylogenetic inference as implemented in IQ-TREE v1.6.8[15]. Dobrava virus (DOBV), Puumala virus (PUUV), Sin Nombre virus (SNV) and Thottapalayam virus (TPMV) were designated

as outgroup.

For Bayesian MCMC analysis, the suitability of substitution models for our datasets were assessed using jModelTest v2.1.10[16], which performed a statistical model selection procedure based on the Akaike Information Criterion (AIC). It identified the best fitting substitution model GTR+ $\Gamma$  for both datasets of complete S and M gene sequences. The MCMC settings consisted of two simultaneous independent runs with four chains each, which were run for 20 million generations and sampled every 200 generation with a 25% burn-in.

For maximum-likelihood analysis, the best-fitting nucleotide substitution model that minimizes the Bayesian Information Criterion (BIC) score was selected by ModelFinder[17], implemented in IQ-TREE. A ML tree was constructed using the best-fitting nucleotide the substitution model, and statistical robustness of the branching order within the tree was assessed using ultrafast bootstrap support values[18] (1000 replicates) and the SH-like approximate likelihood ratio test[19] (SH-aLRT) (5000 replicates). The trees were visualized in FigTree v1.4.4 (<http://tree.bio.ed.ac.uk/software/figtree/>).

Metadata-driven comparative analysis tool (meta-CATS) supplied by ViPR was used to analyze the variation of amino acid between the different phylogenetic groups, host and sample collection years. The P value

threshold was set to 0.05. If a specific amino acid exists only in one species or one group but not in other species or group, this amino acid is considered a ‘significant amino acid’ marker (or synapomorphy).

#### 4. Coalescent and evolution analyses

Complete S gene sequences were used to deduce the evolution history of Hantaan virus. To avoid potential biases due to sampling heterogeneity, the dataset was reduced using CD-HIT[20] by clustering together sequences with a nucleotide sequence identity threshold of 99%. Temporal evolutionary signal in ML tree was evaluated by using TempEst[21] v1.5.1, which plots sample collection dates against root-to-tip genetic distances obtained from the ML phylogeny tree.

The tMRCA, substitution rates, and evolution history were estimated using a Bayesian serial coalescent approach implemented in BEAST v1.10.4[22]. jModelTest v2.1.10. was used to determine the model of nucleotide substitution that best fit the dataset, and the dataset was subsequently run using GTR+I+ $\Gamma$ . Both strict and relaxed (uncorrelated exponential and uncorrelated lognormal) molecular clocks were used for the analysis combined with different tree prior (Constant Population size, GMRF Bayesian Skyride, Bayesian Skyline were used in this study). Time- scale was inferred using an informative substitution rate interval



( $1.0 \times 10^4$  to  $1.0 \times 10^3$  substitutions/site/year) previously estimated for the N gene of rodent-borne hantavirus[23]. Models were compared pairwise by estimating the Log marginal likelihood via path sampling (PS) and stepping stone (SS) analysis[24-26]. For each model, an MCMC was run for 100 million generations, sampling every 10,000 steps. Posterior probabilities were calculated using the program Tracer1.7 after 10% burn-in. The results were accepted only if the effective sample sizes (ESS) exceeded 200.

The selected molecular clock/demographic model (strict clock with Bayesian skyline prior in this study) was then used for the Bayesian phylogeographic inference based on the continuous-time Markov Chain (CTMC) process over discrete sampling locations to estimate the diffusion rates among locations, with Bayesian stochastic search variable selection (BSSVS). The MCMC was run for 200 million generations, with sampling every 20,000 generations. Only parameter estimates with ESS values exceeding 200 were accepted. A maximum clade credibility (MCC) tree with the phylogeographic reconstruction was selected from the posterior tree distribution after a 10% burn-in using the Tree Annotator v 1.10 and was manipulated in FigTree v1.4.4. The migration routes were visualized using SPREAD3[27]. Migration pathways were considered to be important when they yielded a Bayes factor greater than

15 and when the mean posterior value of the corresponding was greater than 0.50. Bayes factors were interpreted according to the guidelines of Kass and Raftery[28].

## Results

### 1. HTNV sequences dataset

A total of 225 complete S gene sequences and 180 complete M gene sequences from 238 HTNV strains were contained in the dataset. The sampling dates of the sequences ranged from 1976 to 2017. According to the sample collection area, 18 regions were defined, including Russia, South Korea and 16 provinces of China (Fig 1A). The samples were collected from 9 kinds of hosts, including *Apodemus agrarius*, *Apodemus peninsulae*, *Rattus norvegicus*, *Mus musculus*, *Niventer confucianus*, *Tscherskia triton*, *Mirotus fortis*, *Crocidura russula*, and *Homo sapiens*.

The details of the sequences are shown in Fig 1.

### Fig 1. The details of the datasets.

(A) The number of isolates collected from different regions. The bars were colored in different sampling years. (AH, Anhui; GD, Guangdong; GZ, Guizhou; HB, Hubei; HLJ, Heilongjiang; HN, Hunan; JL, Jilin; JS, Jiangsu; JX, Jiangxi; LN, Liaoning; RUS, Russia; SC, Sichuan; SD, Shandong; SK, South Korea; SX, Shaanxi; TJ, Tianjin; UN, Unknown; YN, Yunnan; ZJ, Zhejiang;) (B) The number of isolates collected from different hosts. (Aa,

*Apodemus agrarius*; *Ap*, *Apodemus peninsulae*; *Rn*, *Rattus norvegicus*; *Mm*, *Mus musculus*; *Nc*, *Niventer confucianus*; *Tt*, *Tscherskia triton*; *Mf*, *Mirotus fortis*; *Cr*, *Crocidura russula*; *Hs*, *Homo sapiens*.) The bars were colored in different regions. (C) The number of isolates collected in different years.

## 2. Recombination events detection

To reduce the potential bias, the recombination segments should be removed from the datasets. Recombination events were detected among all the 225 complete S gene sequences and 180 complete M gene sequences from 238 HTNV strains collected in this study. The RDP analysis suggested 9 recombination events in 6 HTNV isolates, and all the recombination events were occurred in M gene segment (Table 1). Similar recombination events were detected in three isolates (CGAa31MP7, CGAa31P9, CGHu2). All this three isolates were collected during 2004 to 2005 in Guizhou province[8]. It would imply that these isolates have the same ancestor which has experienced recombination before. Although only 5 methods suggested the recombination event occurred in strain JN131026, the p-values were all lower than 0.01. Considering the consensus score is higher than 0.6 (0.646), we defined it as a recombinant isolate. P-values of the event tested in strain A16 were in high credible level.

Table 1. Recombination events detected in all HTNV sequences

| Events | Recombinant | Segment | Beginning | Ending | Major Parent | Minor Parent | Method(s) by which breakpoint was detected in RDP4 |
|--------|-------------|---------|-----------|--------|--------------|--------------|----------------------------------------------------|
| 1      | CGAa31MP7   | M       | 1756      | 1916   | CGRni1       | CGRn15       | RDP/GENECONV/MaxChi/Chimaera/Bootscan/SisScan/3Seq |
| 2      | CGAa31MP7   | M       | 2315      | 3402   | Q32          | CGRn2616     | RDP/GENECONV/MaxChi/Chimaera/Bootscan/SisScan/3Seq |
| 3      | CGAa31P9    | M       | 1756      | 1916   | CGRni1       | CGRn15       | RDP/GENECONV/MaxChi/Chimaera/Bootscan/SisScan/3Seq |
| 4      | CGAa31P9    | M       | 2315      | 3402   | Q32          | CGRn2616     | RDP/GENECONV/MaxChi/Chimaera/Bootscan/SisScan/3Seq |
| 5      | CGHu2       | M       | 1756      | 1916   | CGRni1       | CGRn15       | RDP/GENECONV/MaxChi/Chimaera/Bootscan/SisScan/3Seq |
| 6      | CGHu2       | M       | 2315      | 3402   | Q32          | CGRn2616     | RDP/GENECONV/MaxChi/Chimaera/Bootscan/SisScan/3Seq |
| 7      | CGRn93P8    | M       | 2386      | 3402   | CGRn93MP8    | CGHu2        | RDP/GENECONV/MaxChi/Chimaera/Bootscan/SisScan/3Seq |
| 8      | JN131026    | M       | 1413      | 2181   | JN131027     | 158577       | MaxChi/Chimaera/Bootscan/SisScan/3Seq              |
| 9      | A16         | M       | 2214      | 3402   | H8205        | SN7          | RDP/GENECONV/MaxChi/Chimaera/Bootscan/SisScan/3Seq |

### 3. Phylogenetic analyses and amino acid substitution analyses

The recombination isolates were excluded first. Our phylogenetic analysis showed that 11 groups were defined with S segment, each with high degree of support (Fig 2). The isolates were mainly clustered together by region. The isolates from South Korea all belonged to Group A. All the sequences from Jiangsu province and one strain from Sichuan (S85\_46) province clustered in Group A with sequences from South Korea. Group B was formed with sequences collected from Russia and the Northeast of China. The isolates collected in Shaanxi were all clustered in Group C except one strain, 84FLi, which was isolated years ago in 1984. All the three isolates from Hubei constituted group D and all the isolates from Shandong clustered as a subgroup in Group E. The other subgroup of Group E contains strains collected from Anhui, Hunan, Guizhou, Shaanxi, Sichuan and Yunnan. The isolates collected from Zhejiang constitute Group G and Group H, except one strain, N8, which included in Group J. Group J also contains isolates from Jiangxi and Liaoning with the sequences of each region clustered together. Group K was formed with three isolates from Russian. We can notice that the isolates collected from Guizhou province were highly divergent. They dispersed in Group B, C, E, F and I. It indicates that HTNV has spread in Guizhou for a long period.

## **Fig 2. Phylogenetic trees of S gene and M gene reconstructed by MyBayes.**

*Posterior node probabilities/SH-like approximate likelihood values/ultrafast bootstrap values for major nodes (black circles) are shown. Splits network analysis of HTNV was also shown.*

There were 10 distinct phylogroups in M gene tree. The structure of phylogenetic tree reconstructed by M gene was identity with S gene tree except for 7 isolates (CGRn15, CGAa2, CGAa75, CGRn2616, CGRn2618, CGRn45, CGHu3) derived from Guizhou province. They were classified into Group I but in the S gene tree they were included in Group C. It suggested that reassortment events occurred in these strains. The branching order within the lineages differed in S and M trees, which indicates the different evolutionary history between the M and S segments.

We analyzed the variation of amino acid between the different phylogenetic groups. We noticed that 5 amino acid sites on NP gene and 37 on Gn/Gc gene were group specific and could be markers to distinguish different groups (Fig 3). No significant variant was found at the highly conserved pentapeptide motif WAASA, which is thought the cleavage of the GPC polypeptide into the Gn and Gc transmembrane proteins[29]. To determine if any of these amino acid sites were located in any known immune epitopes, we compared these significant positions against information about experimentally determined immune epitopes curated by

the IEDB. We found a total of 18 positions that were located in known immune epitopes (Table 2). No significant amino acid marker was found among different hosts or collected times.

**Fig 3. The ‘significant amino acid marker’ of each group.** *The specific amino acid sites of each group were marked by different colors.*

Table2. The significant sequence variations’ location on immune epitopes

| Protein | Variation Site | Epitopes   |                |                   |                 |
|---------|----------------|------------|----------------|-------------------|-----------------|
|         |                | Epitope ID | Description    | Starting Position | Ending Position |
| NP      | 179            | 164302     | NGIRKPKHLYVSLP | 169               | 183             |
|         |                |            | N              |                   |                 |
|         | 296            | 807        | AEAAGCSMI      | 288               | 296             |
|         | 334            | 17746      | FSILQDMRNTIMAS | 332               | 346             |
|         |                |            | K              |                   |                 |
| Gn      |                | 149047     | FSILQDMRNTI    | 332               | 342             |
|         | 8, 9           | 742143     | VMASLVWPV      | 8                 | 16              |
|         | 209            | 567849     | IVCFFVAV       | 208               | 215             |
|         | 216            | 77254      | K216, G217     |                   |                 |
|         | 218            | 77257      | N218, L415     |                   |                 |
|         | 501            | 568239     | PAITFIIL       | 499               | 506             |

|    |           |        |                 |     |      |
|----|-----------|--------|-----------------|-----|------|
| Gc | 664       | 743275 | GVGSVPMHTDLEL   | 663 | 677  |
|    |           |        | DF              |     |      |
|    | 690       | 743113 | FSLTSSSKYTYRR   | 677 | 691  |
|    |           |        | KL              |     |      |
|    |           | 743694 | KYTYRRKLTNPLE   | 684 | 698  |
|    |           |        | EA              |     |      |
|    | 700, 701, | 743887 | LTNPLEEAQSIDLHI | 691 | 705  |
|    | 703       | 742696 | AQSIDLHIEIEEQTI | 698 | 712  |
|    | 963       | 742777 | DHINILVTKDIDFDN | 950 | 964  |
|    |           | 40611  | LVTKDIDFD       | 955 | 963  |
|    | 978       | 744025 | NLGENPCKIGLQT   | 964 | 978  |
|    |           |        | SS              |     |      |
|    |           | 743579 | KIGLQTSSIEGAWG  | 971 | 985  |
|    |           |        | S               |     |      |
|    |           | 744567 | SIEGAWGSGVGFT   | 978 | 992  |
|    |           |        | LT              |     |      |
|    | 1001      | 744698 | TCLVSLTECPTFLT  | 992 | 1006 |
|    |           |        | S               |     |      |
|    |           | 59502  | SLTECPTFL       | 996 | 1004 |



---

|      |        |                |      |      |
|------|--------|----------------|------|------|
|      | 742922 | ECPTFLTSIKACDK | 999  | 1013 |
|      |        | A              |      |      |
| 1042 | 743186 | GKGGHSGSTFRC   | 1034 | 1048 |
|      |        | CHG            |      |      |
|      | 744680 | STFRCCHGEDCSQ  | 1041 | 1055 |
|      |        | IG             |      |      |
| 1054 | 743149 | GEDCSQIGLHAAA  | 1048 | 1062 |
|      |        | PH             |      |      |

---

#### 280 4. The coalescent analyses and evolution of HTNV

281 To avoid potential biases in the phylogeographic reconstructions due  
282 to sampling heterogeneity, we obtained a “non-redundant” subset  
283 including 51 clusters. In order to make our dataset to represent all the 15  
284 regions (there was no sequence with exact collected year from Anhui,  
285 Sichuan and Guangdong), isolate E142, Hunan03 and JS10 were added in  
286 the dataset. Temporal evolutionary signal analyses showed a positive  
287 correlation between genetic divergence and sampling time. The strict clock  
288 with Bayesian skyline prior model yielded a higher log marginal likelihood  
289 than the others, indicating the best fit model for our dataset (Table S1).

290 The results of our Bayesian phylogenetic analysis showed that HTNV  
291 probably first emerged in Zhejiang province of China (root posterior

probability = 0.29), with a most recent common ancestor in 1198 (95% credibility interval 593-1591; Fig 4A). The root posterior probability of Jiangxi, Shaanxi, Guizhou and Heilongjiang were also in higher levels. The MCC tree of HTNV showed four obviously two separate clusters. One was composed of isolates from the northeast of China and its surroundings, and the other was composed of isolates from the south and middle of China (Fig 4B). These indicated HTNV has been evaluating in China respectively for a long time. Reconstruction of the demographic history, using the extended Bayesian skyline plot, revealed that the HTNV population size was relatively constant from 1500 to 1970s, then expanded between 1980s and 1990s, and stayed steady from 2000 until now (Fig 3B). The mean substitution rate of  $2.0427 \times 10^{-4}$  substitution/site/year, with a 95% HPD that ranged from  $1.0001 \times 10^{-4}$  to  $3.2076 \times 10^{-4}$  was estimated.

**Fig 4. The MCC tree, root state posterior probabilities and effective population sizes of Hantaan virus.**

*(A) MCC tree showing the evolutionary relationships and timescale of HTNV. Branch colors denote inferred location states, as shown in the legend. The most recent common ancestor and 95% credibility intervals are shown near the node. (B) The root state posterior probabilities for the different regions. (C) Bayesian skyline plot showing population size through time for HTNV. Highlighted areas correspond to 95% HPD intervals.*

The spatiotemporal linkage of HTNV is shown in Fig 5. Significant location transitions were found mainly in two regions, the northeast and the middle of China (Fig 5A). It indicated that Heilongjiang may be the radiation center of the northeast regions of China and the surrounding countries. Significant migration events were found from Heilongjiang to Liaoning and Far east of Russia. The migration from Heilongjiang to Khabarovsk was detected in high credible level (Bayes factor = 163.0). Shaanxi was assumed as the radiation center of the middle of China. Virus migration from Shaanxi to Tianjin, Yunnan and Guizhou were observed. The number of observed state changes pinpointed Shaanxi as the main source of HTNV epidemics in China, at least in the middle of China, and Heilongjiang as the dominating source of HTNV in northeast of China (Fig 5B).

**Fig 5. Reconstructed phylogeographic linkage and the total number of location state transitions of Hantaan virus.**

(A) The phylogeographic linkage constructed reconstruction of the HTNV using BEAST. Thickness of lines represents the relative transmission rate between two regions. The map was created by SpreadD3 software and the geographic data were provided by the Natural Earth (<https://www.naturalearthdata.com/>). (B) Histogram of the total number of location state transitions inferred from the HTNV dataset.

## Discussion

In this study, we used all the whole-genome sequences of segment S and M obtained from ViPR to analyses the genetic diversity and evolution of HTNV. Our analyses show that the HTNV can be divided into 11 groups. We named the groups based on the S tree for NP gene is more stable and more sequences are available. The isolates were geographic clustering. Sequences obtained from the same geographic area clustered together. It's worth noting that sequences from Guizhou are more diverse. We will discuss this later.

A total of 42 significant amid acid variant sites were found among the different groups. We noticed more significant variants in Group I. Isolates contained in Group I were all from Guizhou. The collection dates were during 1980s to 2000s. It also indicated a high genetic diverse of Hantaan virus in Guizhou. 18 significant amid acid variant positions were found located at known immune epitopes. Experimentation is needed to determine if peptides containing these residues can confers escape or can be used to develop serotype-specific reagents for serology-based diagnostics. None significant amino acid marker was found among different hosts and periods, demonstrating that geographic region is the mainly factor affecting the genetic diversity of HTNV. The different topologies indicate the different evolutionary history between the M and S

segments, which was also found in others studies[30, 31].

Our analyses showed that both reassortment and recombination play important role in HTNV evolution. A number of studies have revealed that genetic reassortment can occur between the arthropod-borne members of the Bunyavirales naturally or experimentally[32-37]. We found 7 reassortment events occurred in M segments which is consistent with Zou, et al[8]. We found 9 recombination events in our study. All the recombination events were occurred in segment M. The reassortment and recombination events found in Gn/Gc envelope glycoproteins were consistent with their functional roles in the viral escape from immunological responses. It should be notice that recombinant A16, isolated in Shaanxi, has both major parent, H8205, and minor parent, SN7. Strain H8205 has been classified into Amur virus, which indicates recombination occurred across different species in hantavirus. Strain SN7 was isolated in Sichuan, which implies the relationship of the evolution of HTNV between Shaanxi and Sichuan. The evidences of recombination have been reported for TULV[38] and PUUV[39], even the recombination in hantavirus is rare[40].

We investigated the evolution and migration of HTNV in China and its surrounding countries using Bayesian phylogeographic inference. Our phylogenetic analyses placed the root of the tree for HTNV in Zhejiang

with strong support (Fig 3B). But no migration event was found from Zhejiang to other regions. It may result from the lack of whole-genomic data from Zhejiang and its surrounding areas. Markov jump estimates between different locations pinpointed Heilongjiang as an important source of HTNV epidemics in northeast of China and far east of Russia. This finding may explain the high endemic in this area since 1931, when HFRS was first recognized in northeast of China[41, 42]. Similar pattern, Shaanxi was recognized as the origin of HTNV spread in middle of China. These can be explained by a scenario in which the virus was first introduced into these areas, then it expanded there. But the transmission sources to Heilongjiang and Shaanxi is still unclear.

Our analyses show the high diversity of isolates from Guizhou province. Phylogenetic analyses show that isolates collected from Guizhou province clustered in Group B, C, F, I. All the reassortment events and 7 of 9 recombination events occurred in Guizhou. We found same recombination pattern in strain CGAa31MP7, CGAa31P9 and CGHu2. All of these indicates that different sources of HTNV transmitted to Guizhou and evolved for a long time in this place[43, 44]. This assumption can be supported by our Markov jump estimate (Fig 4). Guizhou is more than 1,000 meters above sea level, adding to its rich mountainous topography and as much as 92.5% of the province's total

area is characterized by mountains. It makes *A. agrarius*, the main host of HTNV, sympatric in rural resident areas more common. The Hengduan Mountains region was hypothesized to have played an important role in the evolutionary history of *Apodemus* since the Pleistocene era[45, 46]. The Yunnan-Guizhou plateau, which connects and overlaps with the Hengduan Mountains region, is also thought to play an important role in HTNV evolution. But we only found acceptable migration from Shaanxi to Guizhou in our study. This may result from the lack of sequences in Guizhou. To reduce the bias, recombinant and reassortment isolates were removed. We also got rid of similar sequences with the identity more than 99%. So limited sequences from Guizhou were used for evolutionary and phylogeographic analyses. More gene information should be collected in order to know more about the HTNV evolution and spread in this area.

The most recent common ancestor of HTNV was determined about more than 800 years ago in our study. It's much earlier than the first HFRS patient was reported in the early 1930s[47]. But HFRS-like disease was described in Chinese writings about 1000 years ago[48], so we believe HTNV has spread in China for more than 1000 years. The most common recent ancestor by Ramsden[49] was 859 years before present (ybp) for all rodent hantaviruses estimated and 202 ybp for *Murinae*

viruses and a mean substitution rate for rodent hantavirus of  $6.67 \times 10^{-4}$  subs/site/year with a 95% HPD that ranged from  $3.86 \times 10^{-4}$  to  $9.8 \times 10^{-4}$  subs/site/year. Partial sequences (275 nt) were used in this study, which can explain the different in tMRCA estimation. A recent study[50] showed that the estimated rate of nucleotide substitutions for the N gene of all rodent-borne hantavirus was  $6.8 \times 10^{-4}$  subs/site/year, which is similar to  $6.67 \times 10^{-4}$  subs/site/year. Our results implied HTNV evolved in a lower speed compared to the other rodent-borne hantaviruses. The estimated rate of nucleotide substitutions of DOBV and PUUV,  $3 \times 10^{-4}$  and  $5.5 \times 10^{-4}$  subs/site/year separately, supporting our hypothesis[23].

The relatively recent origin of HTNV apparently contradicts the viral-host codivergence theory. Previous estimates of evolutionary dynamics in hantaviruses were based on the critical assumption that the congruence between hantavirus and rodent phylogenies reflects codivergence between these 2 groups since the divergence of the rodent genera *Mus* and *Rattus*, approximately 10 to 40 MYA, which indicates a mean substitution rate in the range of  $10^{-8}$  subs/site/year[39, 51, 52]. However, the observation of host-pathogen phylogenetic congruence does not necessarily indicate codivergence. Phylogenetic congruence between a parasite and its host can also arise from delayed cladogenesis, where the parasite phylogeny tracks that of the host but without temporal association[53]. This could



occur if hantaviruses largely evolve host associations by cross-species transmission and related species tend to live in the same area, in which case a pattern of strong host–pathogen phylogenetic congruence could be observed in the absence of codivergence. Our evolutionary rates were estimated directly from primary sequence data sampled at known dates so that they more closely reflect the evolutionary changes undergone by the virus, at least in the short term. And with a mean substitution rate that is closer to other RNA virus, we consider our results is more reliable than codivergence theory.

Our demographic analyses revealed that HTNV population had expanded from 1980s to 1990s. As HTNV is a kind of rodent-borne virus, the population size of HTNV is relevant to rodents' population. Previous studies have revealed that climatic factors can influence HFRS transmission through their effects on the reservoir host (mostly rodents of the family Muridae) and environmental conditions[54-56]. It's reported that that global annual average temperatures increased by more than 1.2°F (0.7°C) from 1986 to 2016, relative to temperatures seen from 1901 to 1960[57]. Global warming may affect rodent winter survival through winter temperatures by a complicated process, and it may also influence the magnitude of HFRS outbreaks through summer climatic conditions (both temperature and rainfall). Additionally, as global climate change

accelerates, the amount of annual rainfall increased accurately[58].

Moreover, agriculture improved rapidly in China at the same period, leading to more available food, which is fit for the reproduction of rodents. The steady effective population from 2000 until now is benefit from the successful strategy for HTNV prevention in China.

However, some cautions must be taken when interpreting our results. We have estimated the genetic diversity age based only on N gene sequences, the evolution rate of HTNV may be underestimated. For the Gn/Gc envelope glycoproteins are more diverse and considered evolves in a higher speed. Furthermore, there may be geographic biases due to the unbalanced of sequences collecting region. The lack of whole-genome sequences in some region may result in the lacking of knowledge about HTNV migration. In addition, lack of sequences of L gene can be obtained now. More gene information should be collected and shared to solve these problems.

In conclusion, our study revealed 11 groups of HTNV and 43 significant amino acid markers for different groups. Both recombination and reassortment events can be detected in HTNV. The origin and migration of HTNV were also shown by our analyses. And a steady effective population from 2000 until now indicated the successful strategy for HTNV prevention. Guizhou may play an important role in the

evolution and spread of HTNV. As the rodents' population and activity influence the spread and increasing of HTNV. Rodents prevention and control is an effective way to reduce the incidence of diseases. These data provide important insights for better understanding the genetic diversity and spatial-temporal dynamics of HTNV and would be useful for disease prevention and control.

## Reference

1. Papa A. Dobrava-Belgrade virus: Phylogeny, epidemiology, disease. *Antiviral Research*. 95(2):104-17. doi: 10.1016/j.antiviral.2012.05.011.
2. Khaiboullina S, Morzunov S, St. Jeor S. Hantaviruses: Molecular Biology, Evolution and Pathogenesis. *Current Molecular Medicine*. 5(8):773-90.
3. Jonsson CB, Figueiredo LT, Vapalahti O. A global perspective on hantavirus ecology, epidemiology, and disease. 2010;23(2):412-41.
4. Jiang H, Du H, Wang LM, Wang PZ, Bai XF. Hemorrhagic Fever with Renal Syndrome: Pathogenesis and Clinical Picture. *Frontiers in cellular and infection microbiology*. 2016;6:1. Epub 2016/02/13. doi: 10.3389/fcimb.2016.00001. PubMed PMID: 26870699; PubMed Central PMCID: PMC4737898.
5. Lin H, Zhang Z, Lu L, Li X, Liu Q. Meteorological factors are associated with hemorrhagic fever

500 with renal syndrome in Jiaonan County, China, 2006–2011. International Journal of Biometeorology.  
501 2014;58(6):1031-7. doi: 10.1007/s00484-013-0688-1.

502 6. Lee HW, Lee PW, Johnson KM. Isolation of the Etiologic Agent of Korean Hemorrhagic Fever.  
503 The Journal of Infectious Diseases. 1978;137(3):298-308. doi: 10.1093/infdis/137.3.298.

504 7. Plyusnin A, Vapalahti O, Vaheri A. Hantaviruses: genome structure, expression and evolution.  
505 The Journal of general virology. 1996;77 ( Pt 11):2677-87. Epub 1996/11/01. doi: 10.1099/0022-  
506 1317-77-11-2677. PubMed PMID: 8922460.

507 8. Zou Y, Hu J, Wang ZX, Wang DM, Li MH, Ren GD, et al. Molecular diversity and phylogeny  
508 of Hantaan virus in Guizhou, China: Evidence for Guizhou as a radiation center of the present  
509 Hantaan virus. Journal of General Virology. 2008;89:1987-97. doi: 10.1099/vir.0.2008/000497-0.

510 9. Zou Y, Hu J, Wang Z-x, Wang D-m, Yu C, Zhou J-z, et al. Genetic Characterization of  
511 Hantaviruses Isolated from Guizhou , China : Evidence for Spillover and Reassortment in Nature.  
512 2008;1041:1033-41. doi: 10.1002/jmv.

513 10. Zuo S-q, Li X-j, Wang Z-q, Jiang J-f, Fang L-q, Zhang W-H, et al. Genetic Diversity and the  
514 Spatio-Temporal Analyses of Hantaviruses in Shandong Province, China. Frontiers in Microbiology.  
515 2018;9:1-13. doi: 10.3389/fmicb.2018.02771.

516 11. Katoh K, Standley DM. MAFFT multiple sequence alignment software version 7:  
517 improvements in performance and usability. Mol Biol Evol. 2013;30(4):772-80. doi:  
518 10.1093/molbev/mst010. PubMed PMID: 23329690; PubMed Central PMCID: PMC3603318.

519 12. Maes P, Klempa B, Clement J, Matthijssens J, Gajdusek DC, Kruger DH, et al. A proposal

520 for new criteria for the classification of hantaviruses, based on S and M segment protein sequences.

521 Infection, genetics and evolution : journal of molecular epidemiology and evolutionary genetics in

522 infectious diseases. 2009;9(5):813-20. doi: 10.1016/j.meegid.2009.04.012. PubMed PMID:

523 19393771.

524 13. Martin DP, Murrell B, Golden M, Khoosal A, Muhire B. RDP4: Detection and analysis of

525 recombination patterns in virus genomes. Virus Evol. 2015;1(1):vev003. doi: 10.1093/ve/vev003.

526 PubMed PMID: 27774277; PubMed Central PMCID: PMC5014473.

527 14. Ronquist F, Huelsenbeck JP. MrBayes 3: Bayesian phylogenetic inference under mixed

528 models. Bioinformatics. 2003;19(12):1572-4. doi: 10.1093/bioinformatics/btg180.

529 15. Nguyen L-T, Schmidt HA, von Haeseler A, Minh BQ. IQ-TREE: A Fast and Effective Stochastic

530 Algorithm for Estimating Maximum-Likelihood Phylogenies. Molecular Biology and Evolution.

531 2014;32(1):268-74. doi: 10.1093/molbev/msu300.

532 16. Posada D. jModelTest: Phylogenetic Model Averaging. Molecular Biology and Evolution.

533 2008;25(7):1253-6. doi: 10.1093/molbev/msn083.

534 17. Kalyaanamoorthy S, Minh BQ, Wong TKF, von Haeseler A, Jermin LS. ModelFinder: fast

535 model selection for accurate phylogenetic estimates. Nature Methods. 2017;14:587. doi:

536 10.1038/nmeth.4285

537 <https://www.nature.com/articles/nmeth.4285#supplementary-information>.

538 18. Hoang DT, Chernomor O, von Haeseler A, Minh BQ, Vinh LS. UFBoot2: Improving the

539 Ultrafast Bootstrap Approximation. Molecular Biology and Evolution. 2017;35(2):518-22. doi:

540 10.1093/molbev/msx281.

541 19. Guindon S, Dufayard J-F, Lefort V, Anisimova M, Hordijk W, Gascuel O. New Algorithms and  
542 Methods to Estimate Maximum-Likelihood Phylogenies: Assessing the Performance of PhyML 3.0.  
543 Systematic Biology. 2010;59(3):307-21. doi: 10.1093/sysbio/syq010.

544 20. Huang Y, Niu B, Gao Y, Fu L, Li W. CD-HIT Suite: a web server for clustering and comparing  
545 biological sequences. Bioinformatics. 2010;26(5):680-2. doi: 10.1093/bioinformatics/btq003.

546 21. Rambaut A, Lam TT, Max Carvalho L, Pybus OG. Exploring the temporal structure of  
547 heterochronous sequences using TempEst (formerly Path-O-Gen). Virus Evolution. 2016;2(1). doi:  
548 10.1093/ve/vew007.

549 22. Drummond AJ, Suchard MA, Xie D, Rambaut A. Bayesian Phylogenetics with BEAUti and the  
550 BEAST 1.7. Molecular Biology and Evolution. 2012;29(8):1969-73. doi: 10.1093/molbev/mss075.

551 23. Ramsden C, Melo FL, Figueiredo LM, Holmes EC, Zanotto PMA, Moreli ML, et al. High rates  
552 of molecular evolution in hantaviruses. Molecular Biology and Evolution. 2008;25:1488-92. doi:  
553 10.1093/molbev/msn093.

554 24. Baele G, Lemey P, Bedford T, Rambaut A, Suchard MA, Alekseyenko AV. Improving the  
555 Accuracy of Demographic and Molecular Clock Model Comparison While Accommodating  
556 Phylogenetic Uncertainty. Molecular Biology and Evolution. 2012;29(9):2157-67. doi:  
557 10.1093/molbev/mss084.

558 25. Baele G, Li WLS, Drummond AJ, Suchard MA, Lemey P. Accurate Model Selection of Relaxed  
559 Molecular Clocks in Bayesian Phylogenetics. Molecular Biology and Evolution. 2012;30(2):239-43.

560 doi: 10.1093/molbev/mss243.

561 26. Baele G, Lemey P. Bayesian evolutionary model testing in the phylogenomics era: matching  
562 model complexity with computational efficiency. *Bioinformatics*. 2013;29(16):1970-9. doi:  
563 10.1093/bioinformatics/btt340.

564 27. Bielejec F, Baele G, Vrancken B, Suchard MA, Rambaut A, Lemey P. SpredD3: Interactive  
565 Visualization of Spatiotemporal History and Trait Evolutionary Processes. *Molecular Biology and*  
566 *Evolution*. 2016;33(8):2167-9. doi: 10.1093/molbev/msw082.

567 28. Gao F, Liu X, Du Z, Hou H, Wang X, Wang F, et al. Bayesian phylodynamic analysis reveals  
568 the dispersal patterns of tobacco mosaic virus in China. *Virology*. 2019;528:110-7. doi:  
569 10.1016/j.virol.2018.12.001. PubMed PMID: 30594790.

570 29. Lober C, Anheier B, Lindow S, Klenk HD, Feldmann H. The Hantaan virus glycoprotein  
571 precursor is cleaved at the conserved pentapeptide WAASA. *Virology*. 2001;289(2):224-9. doi:  
572 10.1006/viro.2001.1171. PubMed PMID: 11689045.

573 30. Kang HJ, Stanley WT, Esselstyn JA, Gu SH, Yanagihara R. Expanded host diversity and  
574 geographic distribution of hantaviruses in sub-Saharan Africa. *J Virol*. 2014;88(13):7663-7. doi:  
575 10.1128/JVI.00285-14. PubMed PMID: 24741077; PubMed Central PMCID: PMC4054438.

576 31. Razzauti M, Plyusnina A, Henttonen H, Plyusnin A. Microevolution of Puumala hantavirus  
577 during a complete population cycle of its host, the bank vole (*Myodes glareolus*). *PLoS One*.  
578 2013;8(5):e64447. doi: 10.1371/journal.pone.0064447. PubMed PMID: 23717616; PubMed  
579 Central PMCID: PMC3661530.

- 580 32. Beaty BJ, Sundin DR, Chandler LJ, Bishop DH. Evolution of bunyaviruses by genome  
581 reassortment in dually infected mosquitoes (*Aedes triseriatus*). *Science* (New York, NY).  
582 1985;230(4725):548-50. Epub 1985/11/01. doi: 10.1126/science.4048949. PubMed PMID:  
583 4048949.
- 584 33. Szabo R, Radosa L, Lickova M, Slavikova M, Heroldova M, Stanko M, et al. Phylogenetic  
585 analysis of Puumala virus strains from Central Europe highlights the need for a full-genome  
586 perspective on hantavirus evolution. *Virus genes*. 2017;53(6):913-7. Epub 2017/07/01. doi:  
587 10.1007/s11262-017-1484-5. PubMed PMID: 28664467.
- 588 34. Ling J, Smura T, Tamarit D, Huitu O, Voutilainen L, Henttonen H, et al. Evolution and  
589 postglacial colonization of Seewis hantavirus with *Sorex araneus* in Finland. *Infection, genetics and*  
590 *evolution : journal of molecular epidemiology and evolutionary genetics in infectious diseases*.  
591 2018;57:88-97. Epub 2017/11/15. doi: 10.1016/j.meegid.2017.11.010. PubMed PMID: 29133028.
- 592 35. Lee SH, Kim WK, No JS, Kim JA, Kim JI, Gu SH, et al. Dynamic Circulation and Genetic  
593 Exchange of a Shrew-borne Hantavirus, Imjin virus, in the Republic of Korea. *Scientific reports*.  
594 2017;7:44369. Epub 2017/03/16. doi: 10.1038/srep44369. PubMed PMID: 28295052; PubMed  
595 Central PMCID: PMC5353647.
- 596 36. Klempa B. Reassortment events in the evolution of hantaviruses. *Virus genes*.  
597 2018;54(5):638-46. Epub 2018/07/27. doi: 10.1007/s11262-018-1590-z. PubMed PMID: 30047031;  
598 PubMed Central PMCID: PMC6153690.
- 599 37. Guterres A, de Oliveira RC, Fernandes J, Maia RM, Teixeira BR, Oliveira FCG, et al. Co-



600 circulation of Araraquara and Juquitiba Hantavirus in Brazilian Cerrado. *Microbial ecology*.  
601 2018;75(3):783-9. Epub 2017/09/01. doi: 10.1007/s00248-017-1061-4. PubMed PMID: 28856421.

602 38. Nikolic V, Stajkovic N, Stamenkovic G, Cekanac R, Marusic P, Siljic M, et al. Evidence of  
603 recombination in Tula virus strains from Serbia. *Infection, genetics and evolution : journal of*  
604 *molecular epidemiology and evolutionary genetics in infectious diseases*. 2014;21:472-8. doi:  
605 10.1016/j.meegid.2013.08.020. PubMed PMID: 24008094.

606 39. Sironen T, Vaheri A, Plyusnin A. Molecular evolution of Puumala hantavirus. *J Virol*.  
607 2001;75(23):11803-10. doi: 10.1128/JVI.75.23.11803-11810.2001. PubMed PMID: 11689661;  
608 PubMed Central PMCID: PMC114766.

609 40. Chare ER, Gould EA, Holmes EC. Phylogenetic analysis reveals a low rate of homologous  
610 recombination in negative-sense RNA viruses. *The Journal of general virology*. 2003;84(Pt  
611 10):2691-703. Epub 2003/09/19. doi: 10.1099/vir.0.19277-0. PubMed PMID: 13679603.

612 41. Wu W, Guo JQ, Yin ZH, Wang P, Zhou BS. GIS-based spatial, temporal, and space-time  
613 analysis of haemorrhagic fever with renal syndrome. *Epidemiol Infect*. 2009;137(12):1766-75. doi:  
614 10.1017/S0950268809002659. PubMed PMID: 19393118.

615 42. Zhang WY, Wang LY, Liu YX, Yin WW, Hu WB, Magalhaes RJ, et al. Spatiotemporal  
616 transmission dynamics of hemorrhagic fever with renal syndrome in China, 2005-2012. *PLoS Negl*  
617 *Trop Dis*. 2014;8(11):e3344. doi: 10.1371/journal.pntd.0003344. PubMed PMID: 25412324;  
618 PubMed Central PMCID: PMC4239011.

619 43. Wang DM, Wang ZX, Tong YB, Liu M, Cai XH, Hu LJ, et al. [Surveillance on hemorrhagic fever

620 with renal syndrome in Guizhou during 1984-2000]. *Zhonghua liu xing bing xue za zhi* = *Zhonghua*  
621 *liuxingbingxue zazhi*. 2003;24(8):694-6. Epub 2003/10/03. PubMed PMID: 14521790.

622 44. Wang ZX. [Preliminary study on epidemic hemorrhagic fever (EHF) in Guizhou Province].  
623 *Zhonghua liu xing bing xue za zhi* = *Zhonghua liuxingbingxue zazhi*. 1989;10(1):1-5. Epub  
624 1989/02/01. PubMed PMID: 2567626.

625 45. Hille A, Tarkhnishvili D, Meinig H, Hutterer R. Morphometric, biochemical and molecular traits  
626 in Caucasian wood mice (*podemus/Sylvaemus*), with remarks on species divergence. *Acta*  
627 *Theriologica*. 2002;47(4):389-416. doi: 10.1007/bf03192465.

628 46. Liu X, Wei F, Li M, Jiang X, Feng Z, Hu J. Molecular phylogeny and taxonomy of wood mice  
629 (genus *Apodemus* Kaup, 1829) based on complete mtDNA cytochrome b sequences, with  
630 emphasis on Chinese species. *Molecular phylogenetics and evolution*. 2004;33(1):1-15. Epub  
631 2004/08/25. doi: 10.1016/j.ympev.2004.05.011. PubMed PMID: 15324834.

632 47. Chen HX, Qiu FX. Epidemiologic surveillance on the hemorrhagic fever with renal syndrome  
633 in China. *Chinese medical journal*. 1993;106(11):857-63. Epub 1993/11/01. PubMed PMID:  
634 7908258.

635 48. Klein SL, Calisher CH. Emergence and Persistence of Hantaviruses. In: Childs JE, Mackenzie  
636 JS, Richt JA, editors. *Wildlife and Emerging Zoonotic Diseases: The Biology, Circumstances and*  
637 *Consequences of Cross-Species Transmission*. Berlin, Heidelberg: Springer Berlin Heidelberg;  
638 2007. p. 217-52.

639 49. Ramsden C, Holmes EC, Charleston MA. Hantavirus Evolution in Relation to Its Rodent and

640 Insectivore Hosts : No Evidence for Codivergence. 2008. doi: 10.1093/molbev/msn234.

641 50. Souza WM, Bello G, Amarilla AA, Alfonso HL, Aquino VH, Figueiredo LTM. Phylogeography  
642 and evolutionary history of rodent-borne hantaviruses. INFECTION, GENETICS AND EVOLUTION.  
643 2014;21:198-204. doi: 10.1016/j.meegid.2013.11.015.

644 51. Nemirov K, Henttonen H, Vaheri A, Plyusnin A. Phylogenetic evidence for host switching in  
645 the evolution of hantaviruses carried by Apodemus mice. Virus research. 2002;90(1-2):207-15.  
646 Epub 2002/11/30. doi: 10.1016/s0168-1702(02)00179-x. PubMed PMID: 12457975.

647 52. Hughes AL, Robert F. Evolutionary Diversification of Protein-Coding Genes of Hantaviruses.  
648 Molecular Biology & Evolution. 2000;(10):10.

649 53. Jackson AP, Charleston MA. A cophylogenetic perspective of RNA-virus evolution. Mol Biol  
650 Evol. 2004;21(1):45-57. Epub 2003/09/02. doi: 10.1093/molbev/msg232. PubMed PMID:  
651 12949128.

652 54. Zhang WY, Guo WD, Fang LQ, Li CP, Bi P, Glass GE, et al. Climate variability and  
653 hemorrhagic fever with renal syndrome transmission in Northeastern China. Environmental health  
654 perspectives. 2010;118(7):915-20. Epub 2010/02/10. doi: 10.1289/ehp.0901504. PubMed PMID:  
655 20142167; PubMed Central PMCID: PMC2920909.

656 55. Clement J, Vercauteren J, Verstraeten WW, Ducoffre G, Barrios JM, Vandamme A-M, et al.  
657 Relating increasing hantavirus incidences to the changing climate: the mast connection.  
658 International Journal of Health Geographics. 2009;8(1):1. doi: 10.1186/1476-072X-8-1.

659 56. Tian HY, Yu PB, Luis AD, Bi P, Cazelles B, Laine M, et al. Changes in rodent abundance and

660 weather conditions potentially drive hemorrhagic fever with renal syndrome outbreaks in Xi'an,  
661 China, 2005-2012. PLoS Negl Trop Dis. 2015;9(3):e0003530. doi: 10.1371/journal.pntd.0003530.  
662 PubMed PMID: 25822936; PubMed Central PMCID: PMC4378853.

663 57. McCarthy M. Global climate is warming rapidly, US draft report warns. BMJ. 2017;358:j3824.  
664 doi: 10.1136/bmj.j3824. PubMed PMID: 28794049.

665 58. Tian H, Yu P, Cazelles B, Xu L, Tan H, Yang J, et al. Interannual cycles of Hantaan virus  
666 outbreaks at the human-animal interface in Central China are controlled by temperature and rainfall.  
667 Proc Natl Acad Sci U S A. 2017;114(30):8041-6. doi: 10.1073/pnas.1701777114. PubMed PMID:  
668 28696305; PubMed Central PMCID: PMC5544290.

670    Table S1. Log Marginal Likelihoods computed by Path Sampling and Stepping Stone Sampling



## Segment S

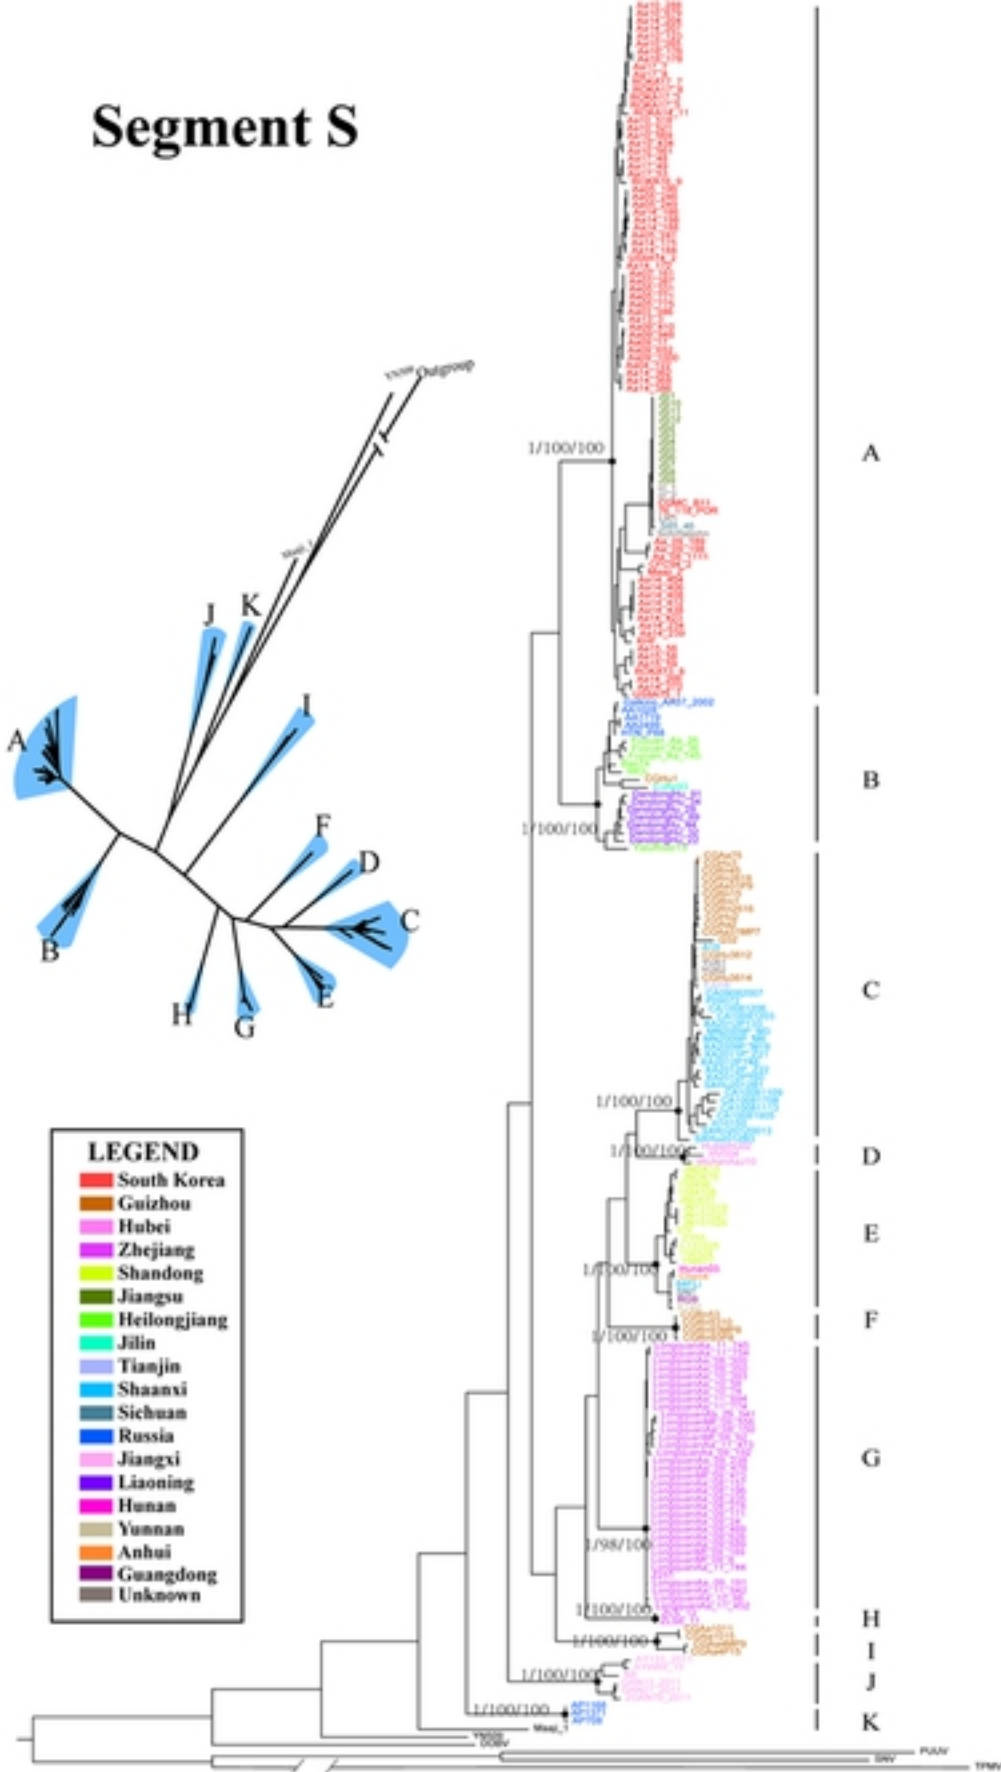

## Segment M

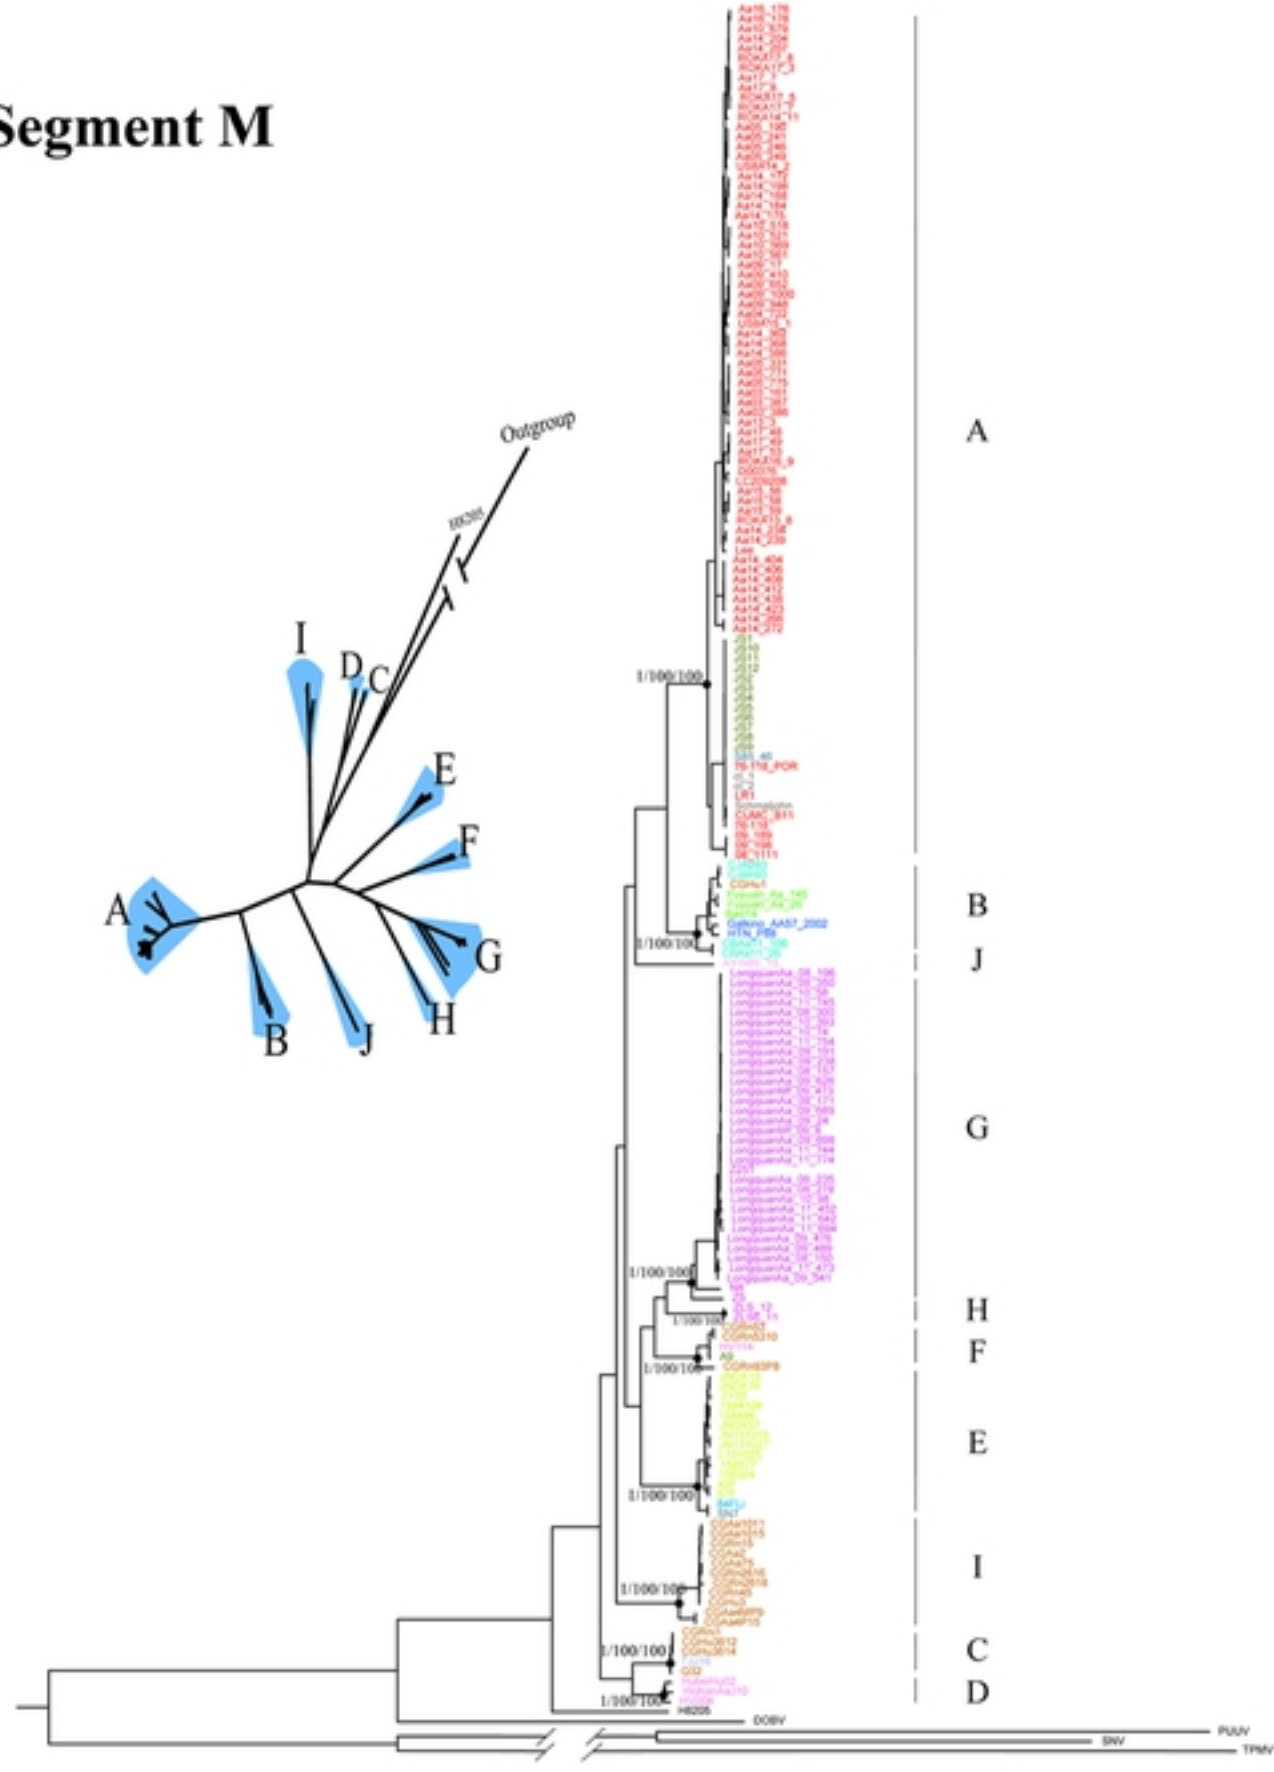

Figure2

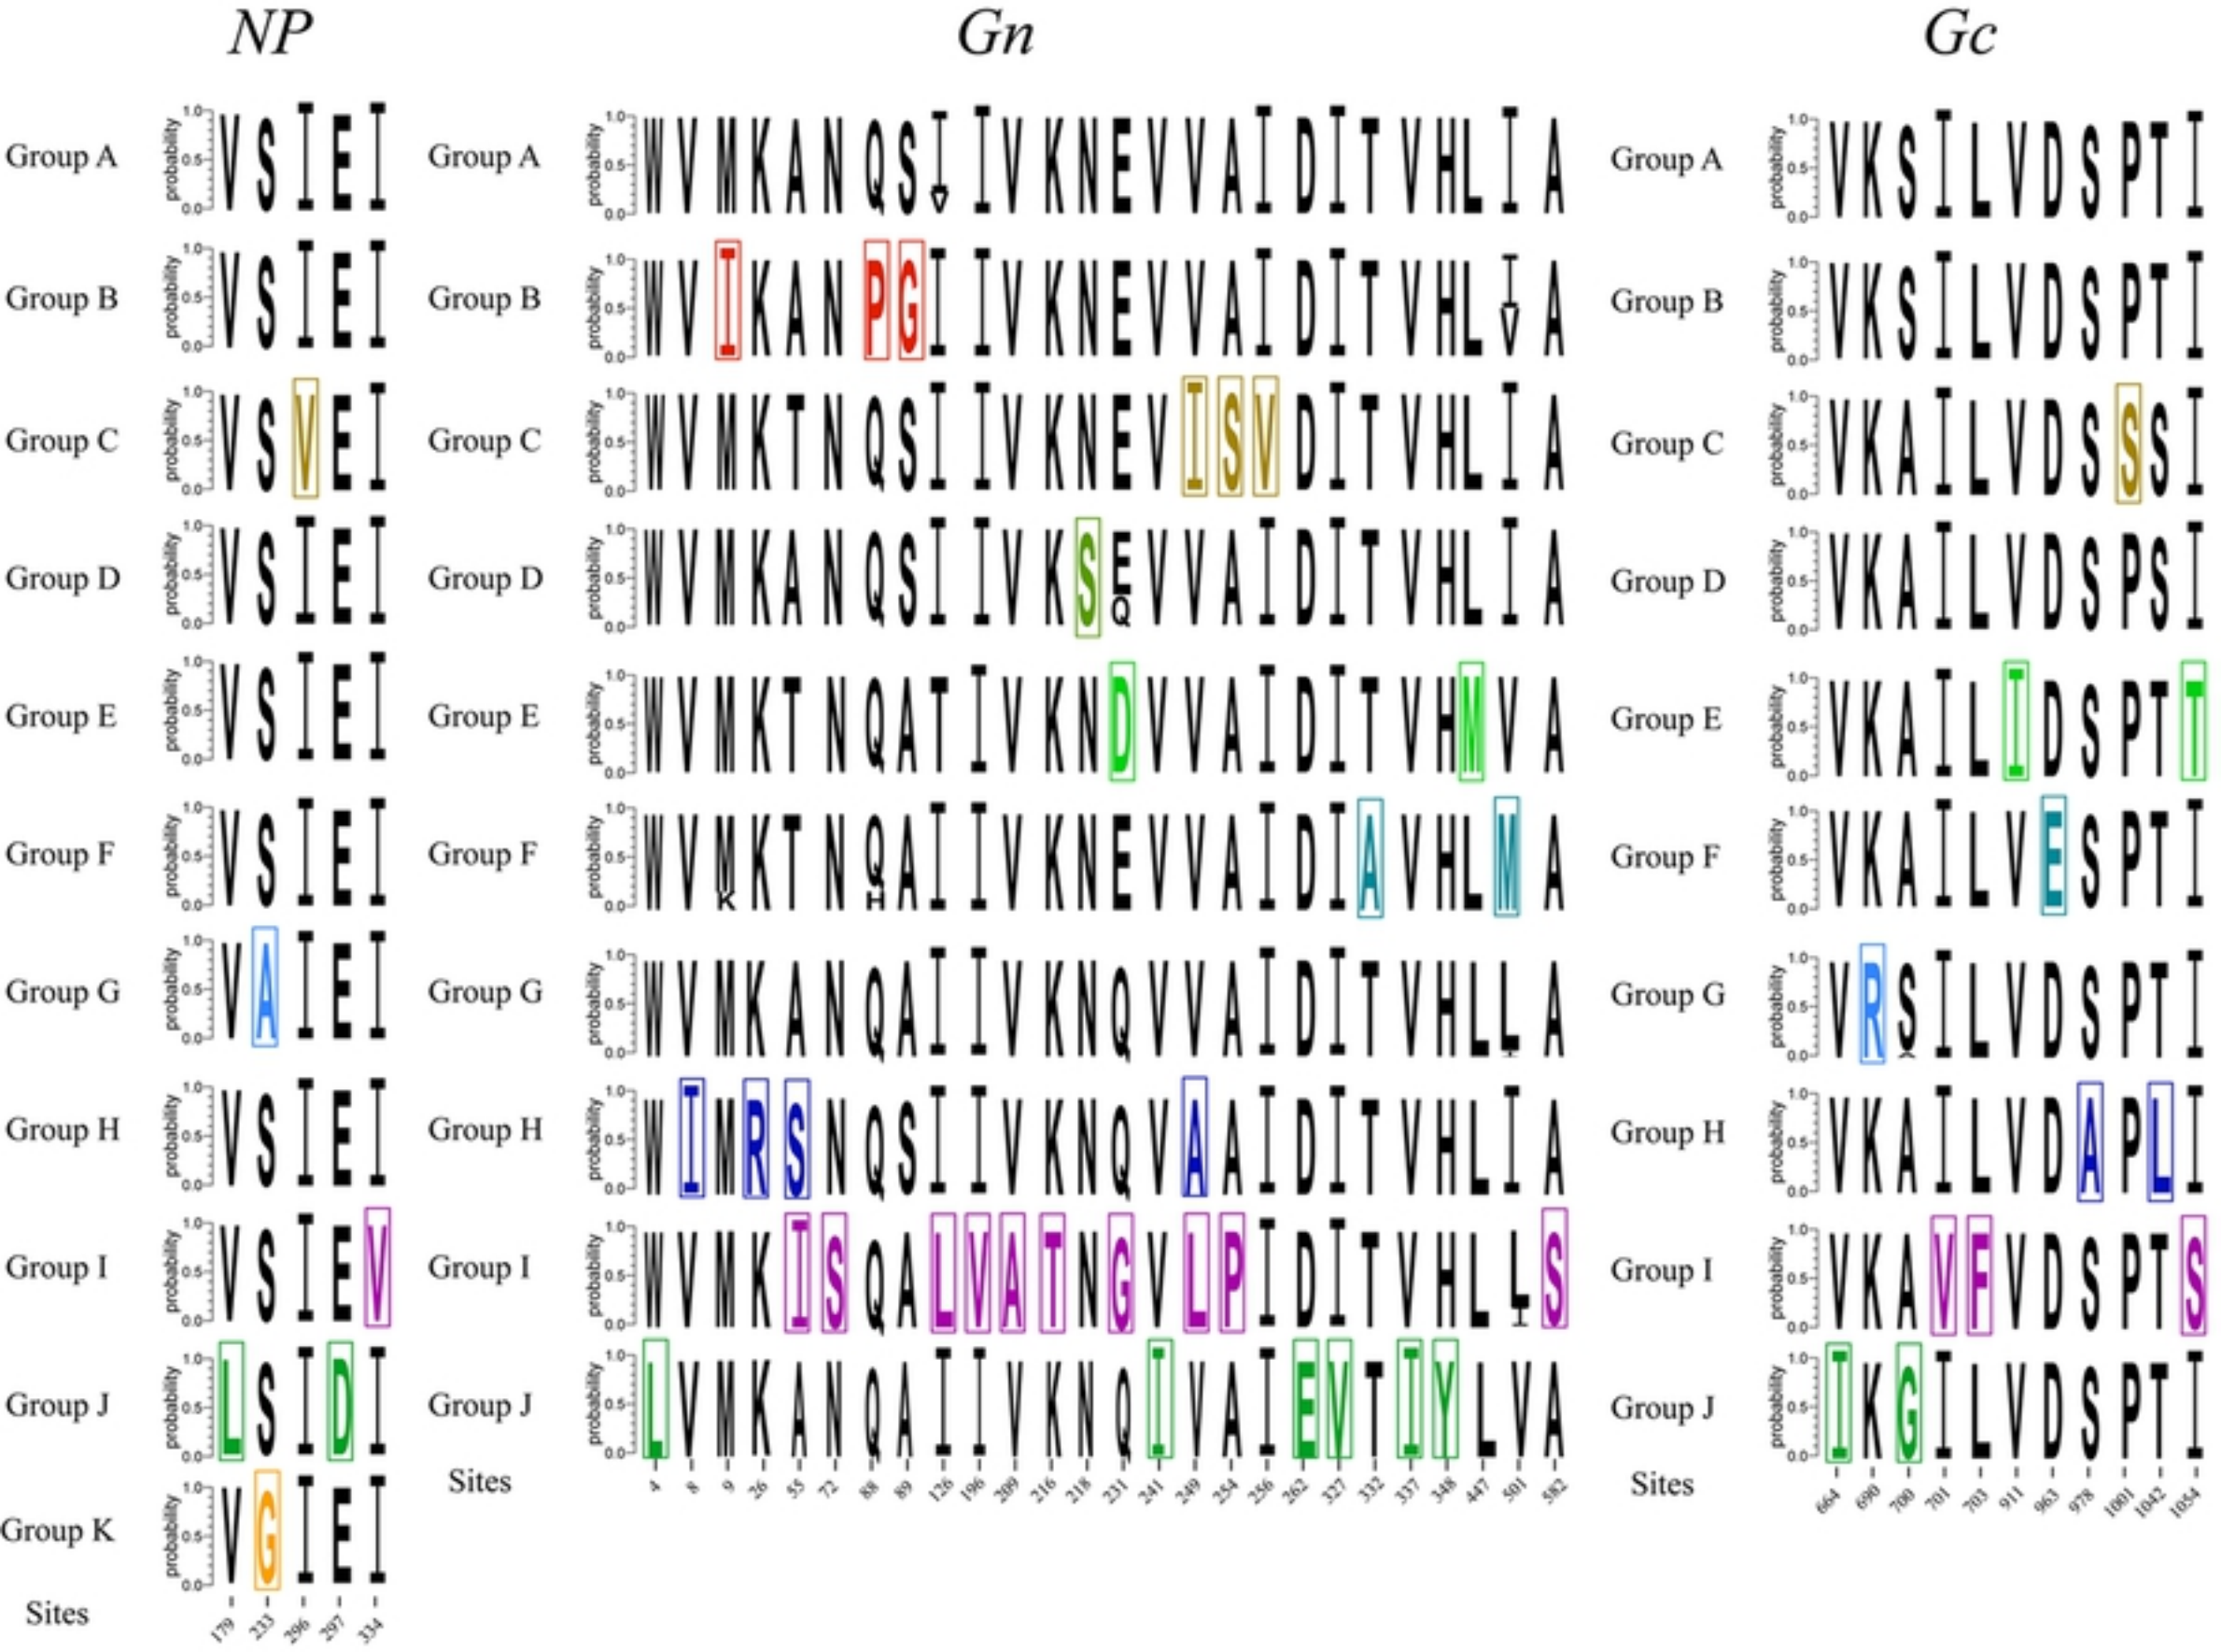

Figure3



A

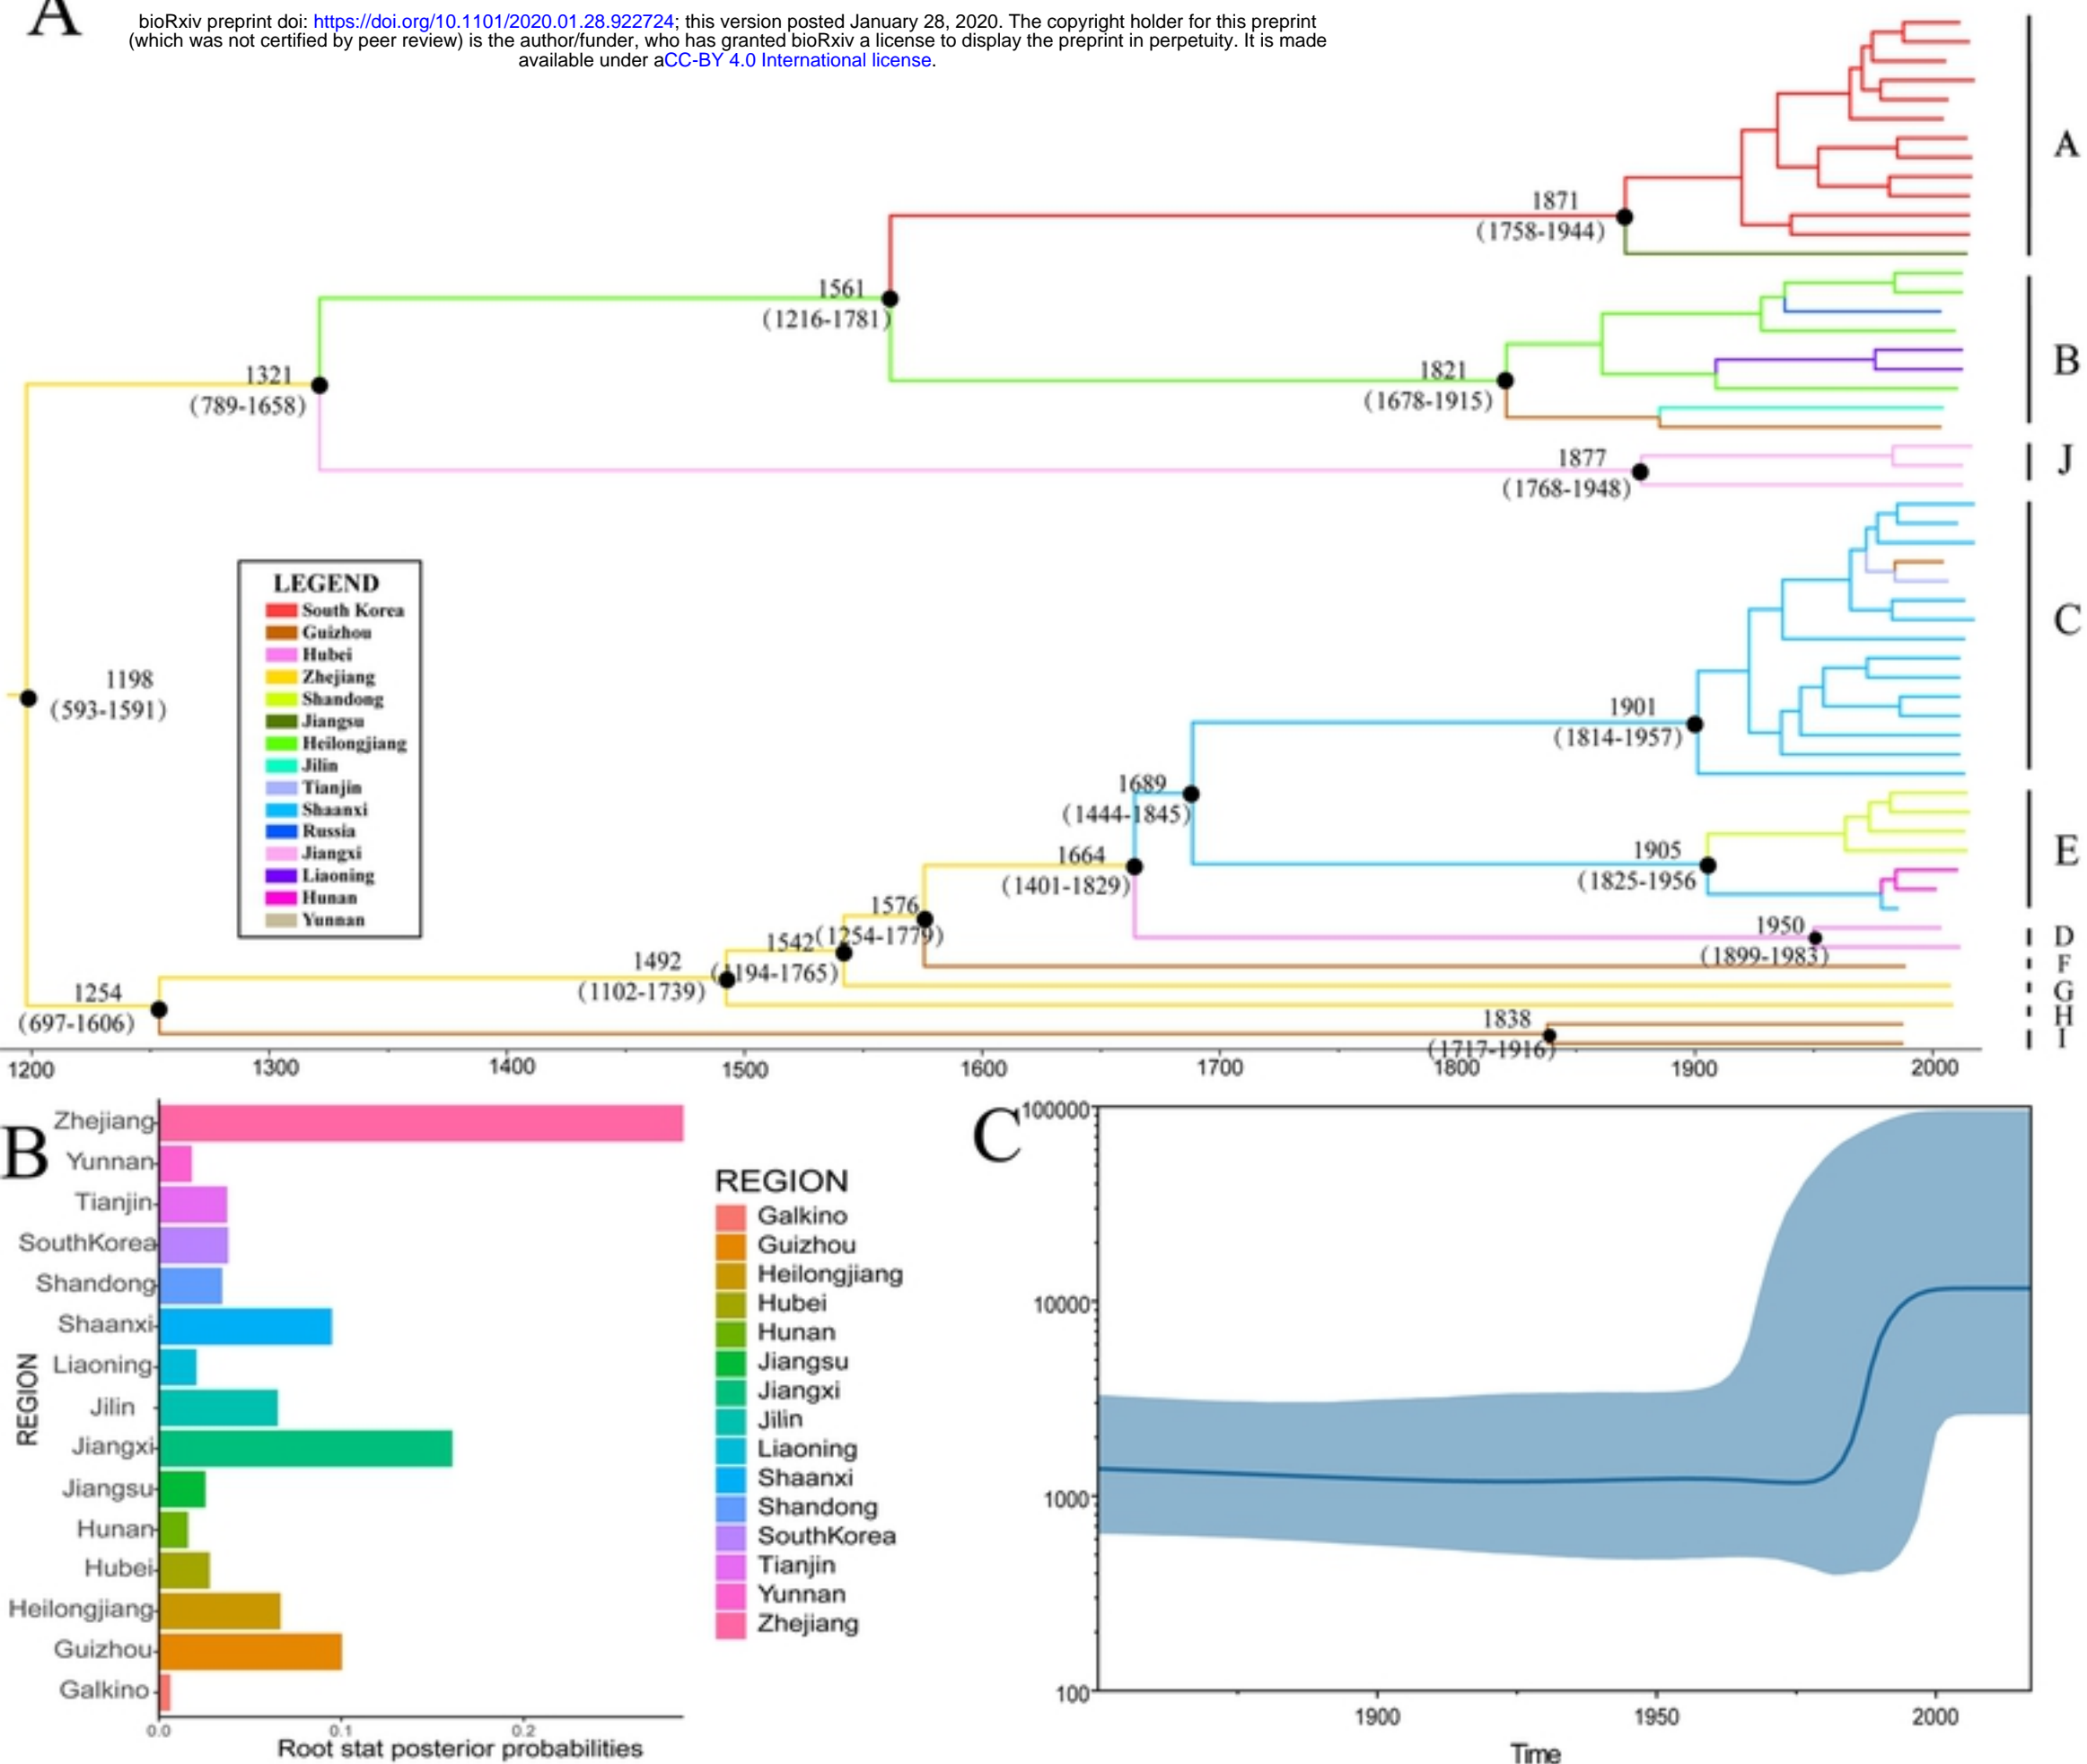

Figure4

A

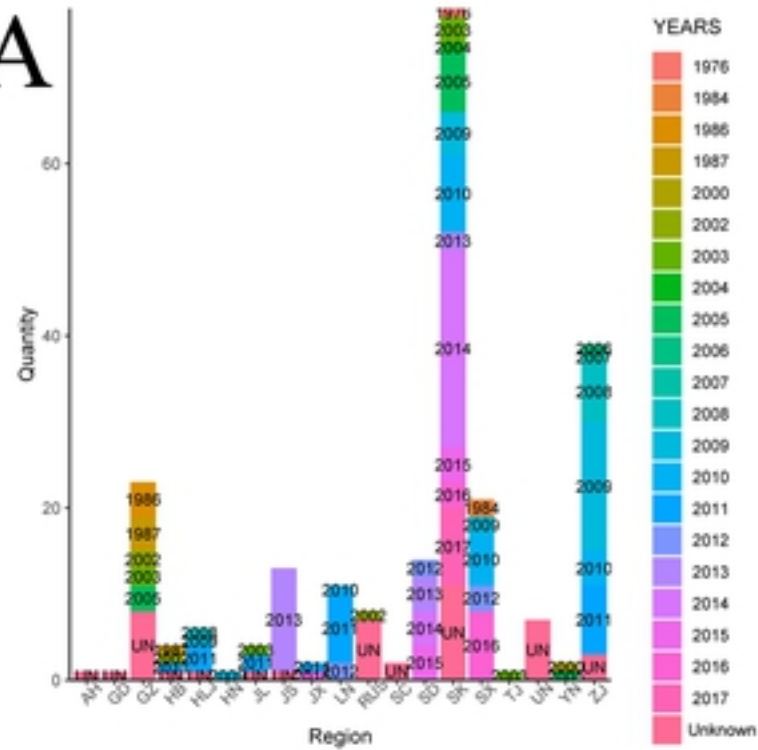

B

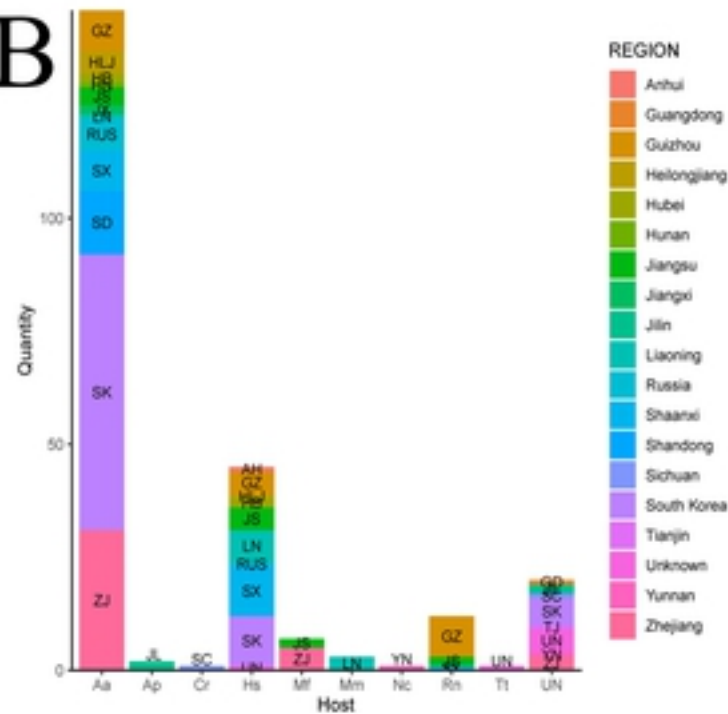

C

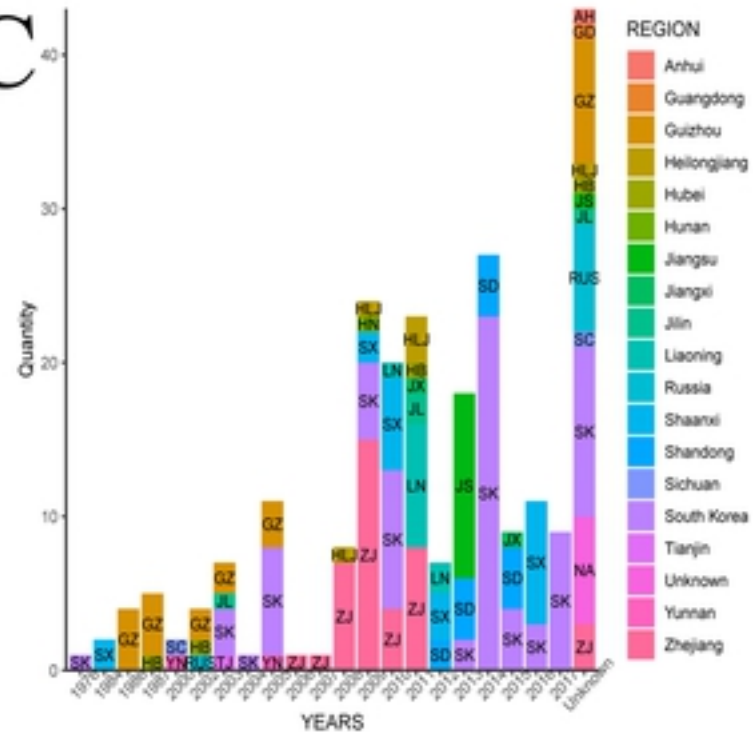

Figure

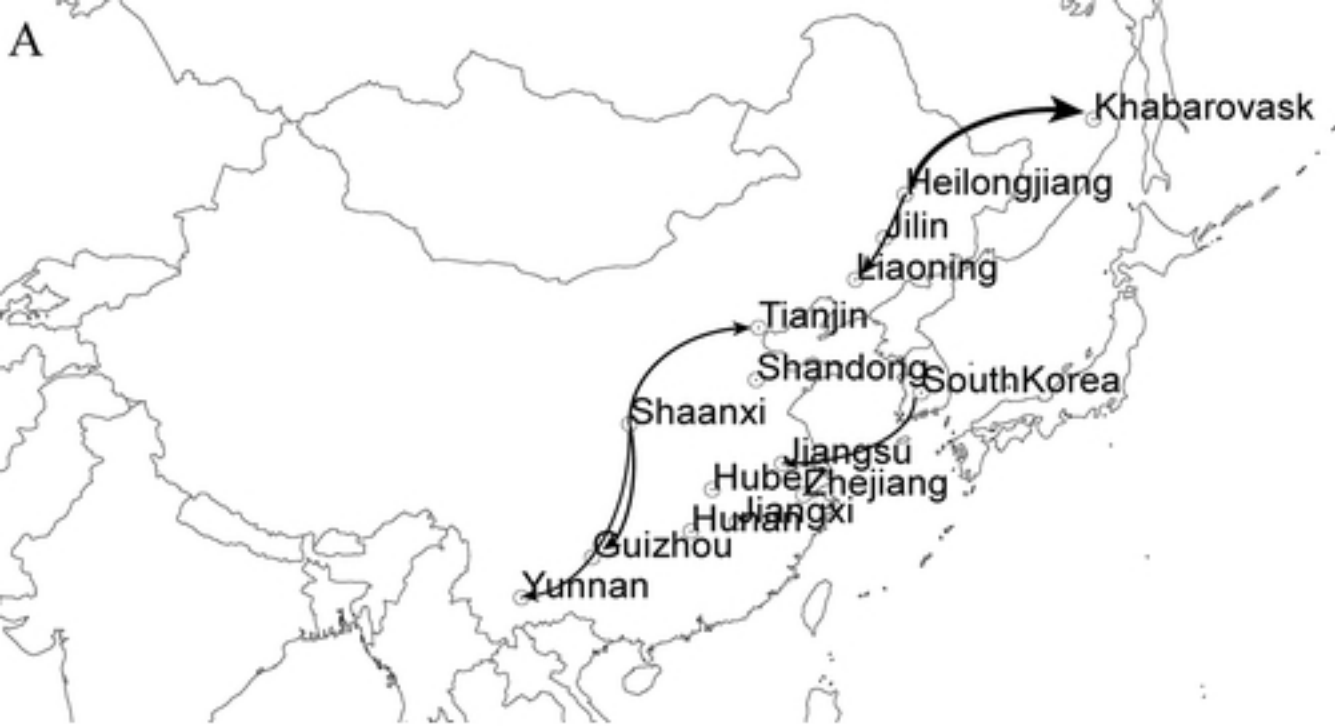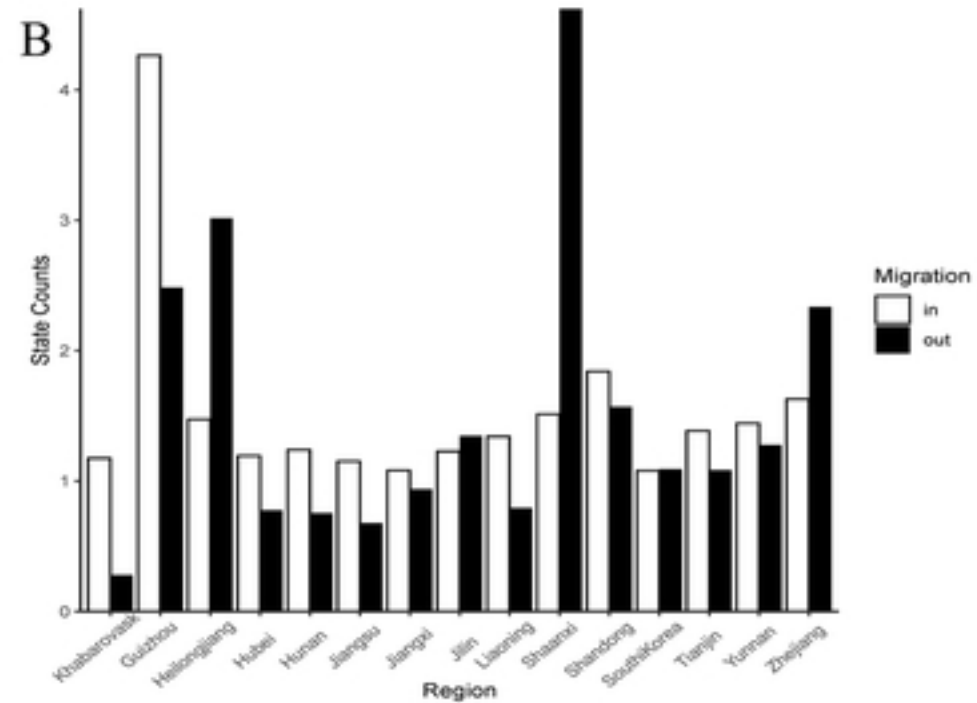

Figure
